# Supplementary material
Source: Springer Nature journal article supplement (https://www.springermedizin.de/resource/supplementary/12950_2010_155_MOESM1_ESM.pdf/9558078)

## hs-CRP

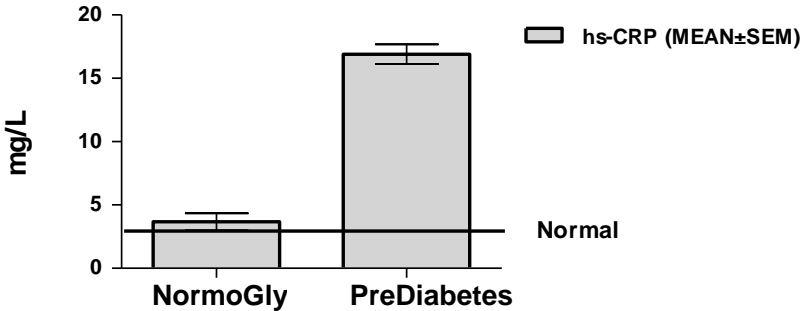

## Fibrinogen

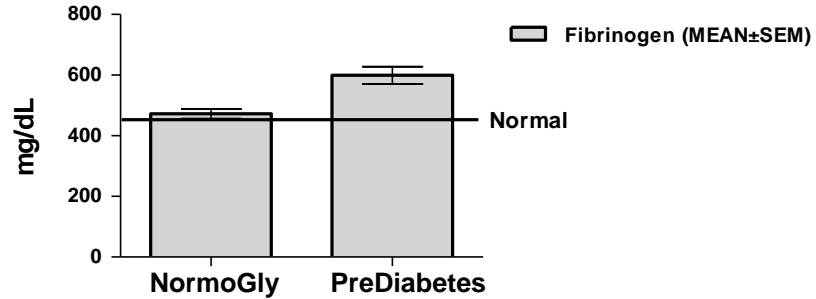

Supplement: MOESM1 [file 9558078]
